# Supplementary material for: Gastric adenomas and their management in familial adenomatous polyposis
Source: PubMed Central journal article supplement — Endoscopy. 2020 Sep 17;53(8):795–801. doi: 10.1055/a-1265-2716 (PMC8315898; doi:10.1055/a-1265-2716), 2020-09-17
Supplement: 18860supmat_10-1055-a-1265-2716.pdf [file 18860supmat_10-1055-a-1265-2716.pdf]

## Supplementary material

Fig. 1s Patients included in study analysis

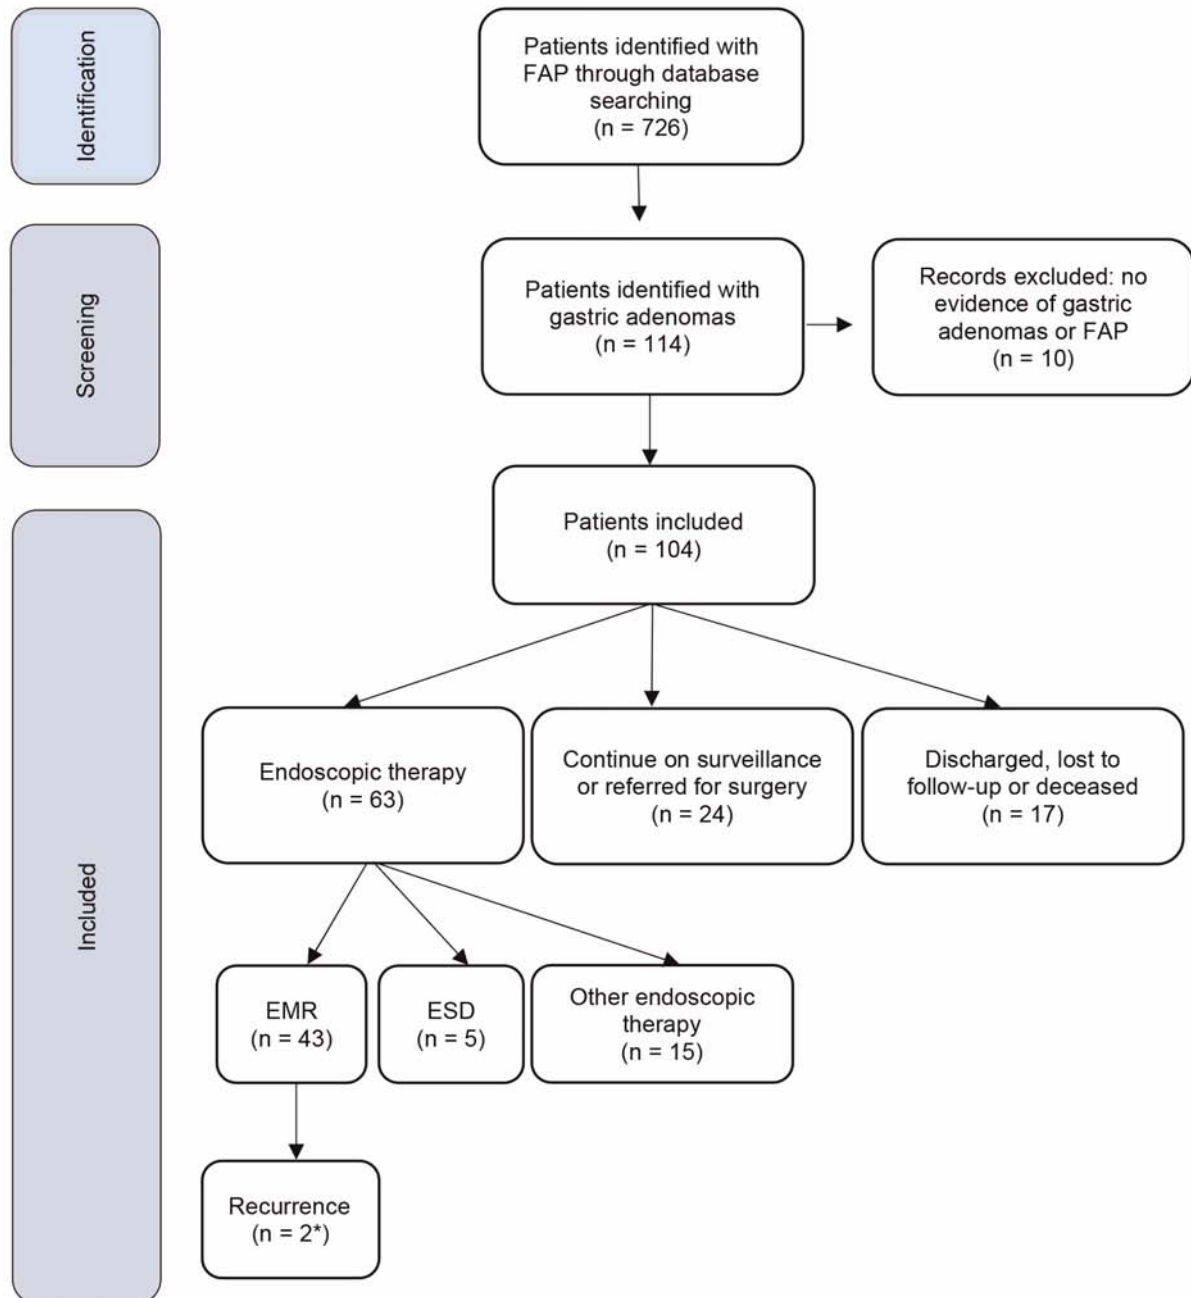

EMR, endoscopic mucosal resection; ESD, endoscopic submucosal dissection

\* Recurrence occurred following piecemeal resection of lesions 15-50mm

## Supplementary material

**Table 1s** Patient Demographics.

| Demographic                                               |                                            | No. of patients |
|-----------------------------------------------------------|--------------------------------------------|-----------------|
|                                                           | Patients                                   | 104             |
| Gender                                                    | Female                                     | 49              |
|                                                           | Male                                       | 55              |
| Age at diagnosis (years)                                  | Median (range)                             | 47 (19-80)      |
| Follow-up from initial gastric adenoma diagnosis (months) | Median (range)                             | 37 (0-242)      |
| APC mutation                                              | Mutation identified                        | 78              |
|                                                           | Mutation not classified/identified         | 25              |
|                                                           | No APC mutation (risk haplotype)           | 1               |
| Location of APC mutation                                  | Pre-mutation cluster region (5' of 1250)   | 48              |
|                                                           | Mutation cluster region (1250-1464)        | 14              |
|                                                           | Post mutation cluster region (3' of 1464)  | 13              |
|                                                           | Deletion (location unclassified)           | 3               |
| Spigelman Stage                                           | 0                                          | 8               |
|                                                           | I                                          | 11              |
|                                                           | II                                         | 25              |
|                                                           | III                                        | 42              |
|                                                           | IV                                         | 11              |
|                                                           | Not classified                             | 7               |
| Size of largest gastric adenoma                           | <=20mm                                     | 56              |
|                                                           | >20mm                                      | 6               |
|                                                           | Not classified                             | 42              |
|                                                           | Median (mm) (range)                        | 6 (1.5-50)      |
| Location of gastric adenoma                               | Distal to incisura                         | 64              |
|                                                           | Proximal to incisura                       | 36              |
|                                                           | Proximal and distal to incisura (multiple) | 2               |
|                                                           | Not classified                             | 2               |
| Family history of gastric adenoma/carcinoma               |                                            | 11              |

## Supplementary material

**Table 2s** Analysis of risk factors for high grade dysplasia.

| Variable          | Category | No high grade dysplasia | High grade dysplasia | p-value |
|-------------------|----------|-------------------------|----------------------|---------|
| Sex               | Male     | 53 (96%)                | 2 (4%)               | 0.30    |
|                   | Female   | 45 (94%)                | 3 (6%)               |         |
| Size adenoma (mm) | -        | 6 [3, 15]               | 25 [17, 35]          | 0.04    |
| Adenoma location  | Distal   | 62 (97%)                | 2 (3%)               | 0.17    |
|                   | Proximal | 32 (91%)                | 3 (8%)               |         |
|                   | Both     | 2 (100%)                | 0 (0%)               |         |

Data (number (percentage) or median [inter-quartile range])

## Supplementary material

**Table 3s** Features and outcomes of gastric cancer in patients diagnosed with gastric adenomas.

| Gastric Cancer                                                                                          |                                                         | 5-20mm | >20mm | Size not classified | Total | Outcomes                                                                                                                                                                                                                                            |
|---------------------------------------------------------------------------------------------------------|---------------------------------------------------------|--------|-------|---------------------|-------|-----------------------------------------------------------------------------------------------------------------------------------------------------------------------------------------------------------------------------------------------------|
| <b>Total</b>                                                                                            |                                                         | 1      | 1     | 3                   | 5     |                                                                                                                                                                                                                                                     |
| <b>Median age at diagnosis</b>                                                                          |                                                         | 62     | 60    | 52<br>(50-73)       | -     |                                                                                                                                                                                                                                                     |
| <b>Median time from initial diagnosis of gastric adenoma to cancer (months)</b>                         |                                                         | 26     | 102   | 115*                | -     |                                                                                                                                                                                                                                                     |
| <small>* Time from diagnosis of gastric adenoma to cancer diagnosis unclassified for 2 patients</small> |                                                         |        |       |                     |       |                                                                                                                                                                                                                                                     |
| <b>Gender</b>                                                                                           | <b>Female</b>                                           | 0      | 0     | 3                   | 3     |                                                                                                                                                                                                                                                     |
|                                                                                                         | <b>Male</b>                                             | 1      | 1     | 0                   | 2     |                                                                                                                                                                                                                                                     |
| <b>Location</b>                                                                                         | <b>Proximal</b>                                         | 1      | 1     | 1                   | 3     |                                                                                                                                                                                                                                                     |
|                                                                                                         | <b>Distal</b>                                           | 0      | 0     | 2                   | 2     |                                                                                                                                                                                                                                                     |
| <b>Multiplicity</b>                                                                                     | <b>Solitary</b>                                         | 0      | 1     | 1                   | 2     |                                                                                                                                                                                                                                                     |
|                                                                                                         | <b>Multiple</b>                                         | 1      | 0     | 2                   | 3     |                                                                                                                                                                                                                                                     |
| <b>Initial Intervention</b>                                                                             | <b>EMR</b>                                              | 1      | 1     | 1                   | 3     |                                                                                                                                                                                                                                                     |
|                                                                                                         | <b>ESD</b>                                              | 0      | 0     | 1                   | 1     |                                                                                                                                                                                                                                                     |
| <b>Biopsy only no intervention (metastatic disease at initial diagnosis)</b>                            |                                                         | 0      | 0     | 1                   | 1     | No previous diagnosis of gastric adenoma. Gastric cancer associated with liver metastases & not amenable to surgery due to extensive desmoid disease. Died within 1 year of diagnosis                                                               |
| <b>Histology of initial gastric adenoma</b>                                                             | <b>LGD</b>                                              | 1      | 0     | 1                   | 2     |                                                                                                                                                                                                                                                     |
|                                                                                                         | <b>HGD</b>                                              | 0      | 1     | 1                   | 2     | Initial lesion graded as HGD but revised to adenocarcinoma with clear resection margins following ESD. Discharged to local follow up and alive 3 years following intervention                                                                       |
| <b>Repeated intervention</b>                                                                            | <b>EMR</b>                                              | 1      | 0     | 0                   | 1     | Died unexpectedly 1 year later with a new diagnosis of small cell gastric cancer (Small cell gastric cancers are also known as high grade neuroendocrine carcinoma of the stomach and are a rare subtype of extra-pulmonary small cell carcinomas)  |
|                                                                                                         | <b>Subtotal gastrectomy</b>                             | 0      | 1     | 0                   | 1     | Died from metastatic gastric cancer 2 years following surgery for recurrent lesion                                                                                                                                                                  |
|                                                                                                         | <b>Gastrectomy and pancreas preserving duodenectomy</b> | 0      | 0     | 1                   | 1     | 4 years later, further antral adenomas x2 with HGD and one gastric adenocarcinoma in antrum, underwent combined gastrectomy and pancreas preserving duodenectomy for gastric and advanced duodenal disease. Disease free 16 years following surgery |

LGD, Low grade dysplasia; HGD, High grade dysplasia

EMR, endoscopic mucosal resection; ESD, endoscopic submucosal dissection.
